# Supplementary material for: Antibacterial and Antifungal Terpenes from the Medicinal Angiosperms of Asia and the Pacific: Haystacks and Gold Needles
Source: MDPI journal article supplement (doi:10.3390/molecules28093873), 2023-05-04
Supplement: s1 [file s1]

# Antibacterial and Antifungal Terpenes from the Medicinal Angiosperms of Asia and the Pacific: Haystacks and Gold Needles

Table S1. Antibacterial and antifungal terpenes from the medicinal plants of Asia and the Pacific

| TYPE OF TERPENES | NAME OF TERPENES         | Micro-organism                        | MIC (µg/mL) | MBC/MFC | References |
|------------------|--------------------------|---------------------------------------|-------------|---------|------------|
| MONOTERPENES     | Nerol (2)                | <i>C. albicans</i>                    | 200*        |         | [16]       |
|                  | Geranial (5)             | <i>C. albicans</i>                    | 100*        |         | [16]       |
|                  | Citronellol (6)          | <i>Trichophyton sp.</i>               | 34          |         | [14]       |
|                  | Linalool (9)             | <i>C. albicans</i>                    | 500*        |         | [16]       |
|                  | $\alpha$ -Terpineol (24) | <i>E. coli</i> (ATCC 25922)           | 0.7         | 0.7     | [32]       |
|                  |                          | <i>S. enteritidis</i>                 | 3.1         | 3.1     | [32]       |
|                  |                          | <i>S. aureus</i> (ATCC 25923)         | 1.5         | 3.1     | [32]       |
|                  |                          | <i>G. citri-aurantii</i>              | 2°          | 4°      | [34]       |
|                  | Terpinene-4-ol (25)      | <i>E. coli</i> (ATCC 25922)           | 1.5°        | 1.5°    | [32]       |
|                  |                          | <i>S. enteritidis</i>                 | 3.1°        | 3.1°    | [32]       |
|                  |                          | <i>S. aureus</i> (ATCC 25923)         | 1.5°        | 1.5°    | [32]       |
|                  | 1,8-Cineole (27)         | <i>E. coli</i> (ATCC 25922)           | 3.1°        | 3.1°    | [37]       |
|                  |                          | <i>S. enteritidis</i>                 | 6.2°        | 6.2°    | [37]       |
|                  |                          | <i>S. aureus</i> (ATCC 25923)         | 6.2°        | 6.2°    | [37]       |
|                  |                          | <i>furfur</i> (ATCC 44344)            | 62.5        |         | [37]       |
|                  | $\gamma$ -Terpinene (28) | <i>S. enteritidis</i>                 | 3.1°        |         | [32]       |
|                  | $\alpha$ -Terpinene      | <i>C. albicans</i>                    | 100*        |         | [16]       |
|                  | p-Cymene (31)            | <i>C. albicans</i>                    | 100*        |         | [16]       |
|                  | Cuminol (32)             | <i>B. subtilis</i> (ATCC 6633)        | 2           |         | [15]       |
|                  | Thymol (33)              | <i>C. albicans</i> (ATCC 10231)       | 8           |         | [15]       |
|                  |                          | 8 <i>C. parapsilosis</i> (ATCC 22019) | 16          |         | [15]       |
|                  | Thymoquinone (36)        | <i>B. cereus</i>                      | 8           | 8       | [40]       |
|                  |                          | <i>S. aureus</i>                      | 8           | 16      | [40]       |
|                  |                          | <i>C. dublinensis</i>                 | 25          |         | [43]       |

|                |                               |                                    |      |      |         |
|----------------|-------------------------------|------------------------------------|------|------|---------|
| SESQUITERPENES | Carvacrol (37)                | <i>P. aeruginosa</i> (ATCC 10145)  | 2    |      | [15]    |
|                | Farnesol (38)                 | <i>Trichophyton sp.</i>            | 3.5  |      | [14]    |
|                |                               | <i>C. albicans</i>                 | 35   |      | [14]    |
|                | Farnesal (39)                 | <i>S. aureus</i>                   | 40   |      | [14]    |
|                |                               | MRSA                               | 40   |      | [14]    |
|                | Germacrone (40)               | <i>P. aeruginosa</i>               | 15.6 | 31.2 | [46]    |
|                | Costunolide (45)              | <i>T. simii</i>                    | 31.2 |      | [47]    |
|                | Deacetyl xanthumine (47)      | <i>P. dreschleri</i>               | 12.5 |      | [54]    |
|                | Microjaponin (49)             | <i>M. tuberculosis</i>             | 12.5 |      | [60,61] |
|                | 8-Acetoxymutangin (50)        | <i>M. tuberculosis</i>             | 35   |      | [60]    |
|                | Mochinine H (51)              | <i>M. orizae</i>                   | 19.7 |      | [62,64] |
|                | Gossypol (52)                 | <i>S. aureus</i> (TISTR517)        | 1.1  |      | [67]    |
|                |                               | <i>B. cereus</i>                   | 1.1  |      | [68,70] |
|                |                               | <i>E. faecium</i> (VRE)            | 2.5  | 10   | [68,70] |
|                |                               | <i>T. mentagrophytes</i>           | 12.5 |      | [68,70] |
|                |                               | <i>M. canis</i>                    | 25   |      | [68,70] |
|                |                               | <i>T. rubrum</i>                   | 50   |      | [68,70] |
|                |                               | <i>M. gypseum</i>                  | 100  |      | [68,70] |
|                | (+)-6,6'-Methoxygossypol (53) | <i>B. cereus</i>                   | 2.3  |      | [68,70] |
|                | 7-Hydroxycadalene (54)        | <i>B. cereus</i>                   | 0.5  |      | [68,70] |
|                | Mansonone E (55)              | <i>C. gloeosporioides</i>          | 31.2 | 31.2 | [71]    |
|                |                               | <i>P. parasitica</i>               | 31.2 | 125  | [71]    |
|                | Mansonone F (56)              | MRSA                               | 2    |      | [71]    |
|                |                               | <i>B. subtilis</i> (ATCC 6633)     | 2    |      | [71]    |
|                |                               | <i>S. aureus</i> (ATCC 25223)      | 1    |      | [71]    |
|                |                               | <i>S. epidermidis</i> (ATCC 12228) | 0.5  |      | [71]    |
|                |                               | <i>K. pneumoniae</i> (ATCC 10031)  | 8    |      | [71]    |
|                | Cedrelanol (57)               | <i>S. aureus</i>                   | 4    |      | [72]    |
|                |                               | <i>T. mentagrophytes</i>           | 2.3  |      | [72]    |
|                | $\alpha$ -Humulene (61)       | <i>S. lutea</i> (IFO 3232)         | 3.9  |      | [79]    |
|                |                               | <i>B. subtilis</i> (IFO 3026)      | 3.9  |      | [79]    |
|                |                               | <i>X. campestris</i>               | 7.8  |      | [79]    |
|                |                               | <i>M. tuberculosis</i> (H37Ra)     | 6.2  |      | [80]    |
|                | $\alpha$ -Santalol (62)       | <i>T. rubrum</i>                   | 12.5 |      | [87]    |
|                | $\beta$ -Santalol (63)        | <i>T. rubrum</i>                   | 25   |      | [87]    |
|                | Polygodial (64)               | <i>S. cerevisiae</i> (IFO 0203)    | 0.7  |      | [91,92] |

|                    |                                                                                        |                                     |       |     |           |
|--------------------|----------------------------------------------------------------------------------------|-------------------------------------|-------|-----|-----------|
|                    |                                                                                        | <i>H. anomala</i> (IFO 0136)        | 1.5   |     | [91,92]   |
|                    |                                                                                        | <i>C. utilis</i> (ATCC 42402)       | 1.5   |     | [91,92]   |
|                    |                                                                                        | <i>S. libertiana</i>                | 1.5   |     | [91,92]   |
| <b>DITERPENES</b>  | Geranylgeraniol (65)                                                                   | <i>S. aureus</i> (FDA209P)          | < 1.2 |     | [95]      |
|                    | ( <i>E</i> )-Phytol (66)                                                               | <i>M. tuberculosis</i> (H37Rv)      | 32    |     | [96]      |
|                    | Toonaciliatin M (67)                                                                   | <i>T. rubrum</i>                    | 12.5  |     | [98]      |
|                    | 17-Hydroxyjolkinolide B (68)                                                           | <i>M. smegmatis</i>                 | 1.5   |     | [99]      |
|                    | 6 $\beta$ -Cinnamoyl-7 $\beta$ -hydroxyvouacapen-5 $\alpha$ -ol (73)                   | <i>Mycobacterium</i> sp.            | 6.2   |     | [105]     |
|                    | Niloticane (74)                                                                        | <i>B. subtilis</i>                  | 4     |     | [106]     |
|                    |                                                                                        | <i>S. aureus</i>                    | 8     |     | [106]     |
|                    |                                                                                        | <i>K. pneumoniae</i>                | 16    |     | [106]     |
|                    |                                                                                        | <i>E. coli</i>                      | 3     |     | [106]     |
|                    | Neocaesalpin P (75)                                                                    | <i>S. aureus</i>                    | 16    |     | [107]     |
|                    |                                                                                        | <i>S. agalactiae</i>                | 16    |     | [107]     |
|                    |                                                                                        | <i>P. aeruginosa</i>                | 32    |     | [107]     |
|                    | (E)-8 $\beta$ , 17-Epoxyabd-12-ene-15,16-dial (77)                                     | <i>S. aureus</i> (ATCC 6538)        | 3.3   | 6.7 | [109]     |
|                    |                                                                                        | <i>Y. enterocolitica</i>            | 3.3   | 3.3 | [109]     |
|                    | <i>ent</i> -Trachyloban-19-oic acid (78)                                               | <i>M. smegmatis</i>                 | 6.2   |     | [113]     |
|                    |                                                                                        | <i>S. mutans</i>                    | 8.9   |     | [114,115] |
|                    |                                                                                        | <i>P. gingivalis</i>                | 57.6  |     | [114,115] |
|                    | <i>ent</i> -Kaur-16-en-19-oic acid (79)                                                | <i>M. smegmatis</i>                 | 6.2   |     | [118]     |
|                    | <i>ent</i> -18-acetoxy-7 $\alpha$ -hydroxykaur-16-en-15-one (80)                       | <i>M. tuberculosis</i> (H37Ra)      | 3.1   |     | [119]     |
|                    | <i>ent</i> -1 $\beta$ ,14 $\beta$ -Diacetoxy-7 $\alpha$ -hydroxykaur-16-en-15-one (81) | <i>M. tuberculosis</i> (H37Ra)      | 1.5   |     | [119]     |
|                    | Bafoudiosbulbin C (83)                                                                 | <i>M. smegmatis</i> (ATCC 700084)   | 8     | 16  | [121]     |
|                    |                                                                                        | <i>M. tuberculosis</i> (ATCC 27294) | 8     | 8   | [121]     |
|                    | 16 $\alpha$ -Hydroxy-cleroda-3,13 (14) <i>Z</i> -diene-15,16-olide (84)                | <i>S. aureus</i>                    | 6.2   |     | [125]     |
|                    |                                                                                        | <i>E. coli</i>                      | 0.7   |     | [125]     |
|                    |                                                                                        | <i>P. aeruginosa</i>                | 0.7   |     | [125]     |
|                    |                                                                                        | <i>S. typhi</i>                     | 0.7   |     | [125]     |
|                    |                                                                                        | <i>K. pneumoniae</i>                | 1.5   |     | [125]     |
|                    | 16-Oxo-cleroda-3, 13(14) <i>E</i> -diene-15 oic acid (85)                              | <i>S. aureus</i>                    | 12.5  |     | [125]     |
|                    | Euphoheliosnoid E (86)                                                                 | <i>A. viscosus</i> (ATCC 27044)     | 3.9   |     | [133]     |
|                    | Dehydroabietylamine (88)                                                               | <i>S. aureus</i>                    | 12.5  |     | [139]     |
|                    |                                                                                        | <i>P. aeruginosa</i>                | 6.2   |     | [139]     |
|                    | 3,4- <i>seco</i> -Mansumbinoic acid (90)                                               | <i>S. aureus</i> (1199B)            | 4     |     | [142]     |
| <b>TRITERPENES</b> | Aceriphyllic acid A (92)                                                               | <i>S. aureus</i> (503)              | 4     |     | [153]     |

|  |                                                                                                 |                                    |     |      |           |
|--|-------------------------------------------------------------------------------------------------|------------------------------------|-----|------|-----------|
|  |                                                                                                 | MRSA (CCARM 3167)                  | 8   |      | [153]     |
|  |                                                                                                 | <i>S. aureus</i> (CCARM 3505)      | 8   |      | [153]     |
|  |                                                                                                 | <i>B. subtilis</i> (KCTC 1021)     | 8   |      | [153]     |
|  |                                                                                                 | <i>A. calcoaceticus</i>            | 4   |      | [153]     |
|  |                                                                                                 | <i>M. luteus</i> (KCTC 1056)       | 8   |      | [153]     |
|  | Dysoxyhainic acid I (94)                                                                        | <i>B. subtilis</i>                 | 1.5 |      | [156]     |
|  | Taraxerone (95)                                                                                 | <i>C. gloeosporioides</i>          | 5   |      | [163-166] |
|  |                                                                                                 | <i>T. halophyllus</i> (ATCC 13623) | 5   |      | [171]     |
|  | Pristimerin (97)                                                                                | <i>B. subtilis</i>                 | 1.2 | 5    | [172]     |
|  |                                                                                                 | <i>S. epidermidis</i>              | 1.2 | >40  | [172]     |
|  |                                                                                                 | <i>H. capsulatum</i> (0G217B)      | 0.4 | 0.4  | [173,174] |
|  |                                                                                                 | <i>C. neoformans</i>               | 7.8 | 7.8  | [173,174] |
|  |                                                                                                 | <i>C. krusei</i> (ATCC 6258)       | 7.8 | 62.5 | [173,174] |
|  | Celastrol (98)                                                                                  | <i>B. subtilis</i>                 | 0.1 | 2.5  | [175]     |
|  |                                                                                                 | <i>B. cereus</i>                   | 0.6 | 2.5  | [175]     |
|  |                                                                                                 | <i>B. pumilus</i>                  | 0.6 | 2.5  | [175]     |
|  |                                                                                                 | <i>B. megaterium</i>               | 1.2 | 5    | [175]     |
|  |                                                                                                 | <i>S. aureus</i>                   | 1.2 | 5    | [175]     |
|  |                                                                                                 | <i>S. epidermidis</i>              | 0.3 | 15   | [175]     |
|  | Zeylasterone (99)                                                                               | <i>C. albicans</i>                 | 10  | 40   | [176]     |
|  | (20 <i>R</i> )-3 $\beta$ -Hydroxy-24,25,26,27-tetranor-5 $\alpha$ -cycloartan-23,21-olide (100) | MRSA                               | 1.5 |      | [178]     |
|  | Bryononic acid (101)                                                                            | <i>S. enteritica</i>               | 6   |      | [181]     |
|  | Ergosterol-5,8-endoperoxide (107)                                                               | <i>Mycobacterium sp.</i>           | 1   |      | [194]     |

\*:p.p.m.; °:  $\mu$ L/mL
